# Supplementary material for: Effects of Gamma-Glutamyl Transferase on Stroke Occurrence Mediated by Atrial Fibrillation
Source: PubMed Central journal article supplement — J Clin Neurol. 2019 Dec 30;16(1):60–5. doi: 10.3988/jcn.2020.16.1.60 (PMC6974842; doi:10.3988/jcn.2020.16.1.60), 2019-12-30
Supplement: jcn-16-60-s001.pdf [file jcn-16-60-s001.pdf]

**Supplementary Table 1.** Causes of stroke in patients classified as "other determined" stroke

| Causes of stroke                             | n (%)     | GGT (IU/L)*     |
|----------------------------------------------|-----------|-----------------|
| Cancer                                       | 33 (42.3) | 71 [38–257]     |
| Hepatobiliary and pancreatic cancer          | 21 (26.9) | 103 [50–300]    |
| Cholangiocarcinoma                           | 3         |                 |
| Colon cancer with liver metastasis           | 2         |                 |
| Common bile duct cancer                      | 1         |                 |
| Gallbladder cancer                           | 1         |                 |
| Hepatocellular carcinoma                     | 4         |                 |
| Klatskin tumor                               | 1         |                 |
| Lung cancer with liver metastasis            | 3         |                 |
| Metastasis of unknown origin to liver        | 1         |                 |
| Pancreatic cancer                            | 5         |                 |
| Other cancer                                 | 12 (15.4) | 47 [22–69.5]    |
| Brain tumor (anaplastic astrocytoma)         | 1         |                 |
| Breast cancer                                | 1         |                 |
| Cervical cancer                              | 1         |                 |
| Lung cancer without liver metastasis         | 1         |                 |
| Lymphoma                                     | 1         |                 |
| Myelodysplastic syndrome                     | 1         |                 |
| Ovarian cancer                               | 2         |                 |
| Stomach cancer                               | 4         |                 |
| Arterial dissection                          | 19 (24.4) | 29 [22.5–39.5]  |
| Internal carotid artery dissection           | 2         |                 |
| Middle cerebral artery dissection            | 1         |                 |
| Vertebral artery dissection                  | 15        |                 |
| Basilar artery dissection                    | 1         |                 |
| Coagulopathy                                 | 8 (10.3)  | 33 [26–54]      |
| Antiphospholipid syndrome                    | 4         |                 |
| Coagulation factor deficiency                | 4         |                 |
| Others                                       | 18 (23.1) | 24.5 [15–103]   |
| Idiopathic hypereosinophilic syndrome        | 1         |                 |
| Idiopathic thrombocytopenic purpura          | 1         |                 |
| Infective endocarditis                       | 1         |                 |
| Moyamoya disease                             | 3         |                 |
| Procedure related                            | 4         |                 |
| Radiation induced vasculopathy               | 2         |                 |
| Severe anemia from gastrointestinal bleeding | 1         |                 |
| Systemic lupus erythematosus                 | 1         |                 |
| Vasculitis                                   | 4         |                 |
| Total                                        | 78        | 39.5 [24.25–82] |

\*Data are expressed as median and interquartile range.

GGT: gamma-glutamyl transferase.
