# Supplementary material for: Effects of Gamma-Glutamyl Transferase on Stroke Occurrence Mediated by Atrial Fibrillation
Source: PubMed Central journal article supplement — J Clin Neurol. 2019 Dec 30;16(1):60–5. doi: 10.3988/jcn.2020.16.1.60 (PMC6974842; doi:10.3988/jcn.2020.16.1.60), 2019-12-30
Supplement: jcn-16-60-s002.pdf [file jcn-16-60-s002.pdf]

**Supplementary Table 2.** GGT levels according to causes of stroke in "other determined" patients

| <b>Causes of stroke</b> | <b>HBP cancer (n=21)</b> | <b>Other cancer (n=12)</b> | <b>Arterial dissection (n=19)</b> | <b>Coagulopathy (n=8)</b> | <b>Others (n=18)</b> | <b>p</b> |
|-------------------------|--------------------------|----------------------------|-----------------------------------|---------------------------|----------------------|----------|
| GGT                     | 103 [50-300]             | 47 [22-69.5]               | 29 [22.5-39.5]                    | 33 [26-54]                | 24.5 [15-103]        | 0.001    |

Data are expressed as median and interquartile range.

GGT: gamma-glutamyl transferase, HBP: hepatobiliary and pancreatic.
