# Supplementary material for: Effects of Gamma-Glutamyl Transferase on Stroke Occurrence Mediated by Atrial Fibrillation
Source: PubMed Central journal article supplement — J Clin Neurol. 2019 Dec 30;16(1):60–5. doi: 10.3988/jcn.2020.16.1.60 (PMC6974842; doi:10.3988/jcn.2020.16.1.60), 2019-12-30
Supplement: jcn-16-60-s003.pdf [file jcn-16-60-s003.pdf]

**Supplementary Table 3.** GGT levels according to subtypes of ischemic stroke

| <b>TOAST classification</b> | <b>LAA (n=316)</b> | <b>SVO (n=130)</b> | <b>CE (n=270)</b> | <b>UD (n=164)</b> | <b>p</b> |
|-----------------------------|--------------------|--------------------|-------------------|-------------------|----------|
| GGT                         | 26.0 [17.0–39.0]   | 24.0 [16.0–35.0]   | 30.0 [19.0–49.0]  | 25.0 [17.0–46.5]  | 0.03     |

Data are expressed as median and interquartile range.

CE: cardioembolism, GGT: gamma-glutamyl transferase, LAA: large artery atherosclerosis, SVO: small-vessel occlusion, TOAST: Trial of ORG 10172 in Acute Stroke Treatment, UD: undetermined.
