# Supplementary material for: Effects of Gamma-Glutamyl Transferase on Stroke Occurrence Mediated by Atrial Fibrillation
Source: PubMed Central journal article supplement — J Clin Neurol. 2019 Dec 30;16(1):60–5. doi: 10.3988/jcn.2020.16.1.60 (PMC6974842; doi:10.3988/jcn.2020.16.1.60), 2019-12-30
Supplement: jcn-16-60-s004.pdf [file jcn-16-60-s004.pdf]

**Supplementary Table 4.** GVIF of the covariates

| Variable                        | GVIF     | df | GVIF <sup>1/(2×df)</sup> |
|---------------------------------|----------|----|--------------------------|
| Sex                             | 1.432669 | 1  | 1.196941                 |
| Age                             | 1.200594 | 1  | 1.095716                 |
| BMI                             | 1.012567 | 1  | 1.006264                 |
| Initial systolic blood pressure | 1.112932 | 1  | 1.054956                 |
| Fasting glucose                 | 1.321909 | 1  | 1.149743                 |
| Total cholesterol               | 1.12085  | 1  | 1.058702                 |
| AST                             | 2.572234 | 1  | 1.603819                 |
| ALT                             | 2.837002 | 1  | 1.68434                  |
| GGT                             | 1.333075 | 3  | 1.049081                 |
| Previous stroke                 | 1.058378 | 1  | 1.028775                 |
| Hypertension                    | 1.168162 | 1  | 1.080816                 |
| Diabetes                        | 1.35386  | 1  | 1.163555                 |
| Hyperlipidemia                  | 1.081173 | 1  | 1.039795                 |
| Liver disease                   | 1.047067 | 1  | 1.023263                 |
| Smoking history                 | 1.400659 | 1  | 1.183494                 |

ALT: alanine aminotransferase, AST: aspartate aminotransferase, BMI: body mass index, df: degree of freedom, GGT: gamma-glutamyl transferase, GVIF: generalized variance-inflation factor.
