# Supplementary material for: Effects of Gamma-Glutamyl Transferase on Stroke Occurrence Mediated by Atrial Fibrillation
Source: PubMed Central journal article supplement — J Clin Neurol. 2019 Dec 30;16(1):60–5. doi: 10.3988/jcn.2020.16.1.60 (PMC6974842; doi:10.3988/jcn.2020.16.1.60), 2019-12-30
Supplement: jcn-16-60-s005.pdf [file jcn-16-60-s005.pdf]

**Supplementary Table 5.** OR for cardioembolic stroke compared with all other subtypes of ischemic stroke according to GGT

| Quartiles of GGT     | Q1 | Q2               | Q3               | Q4               | <i>p</i> for trend |
|----------------------|----|------------------|------------------|------------------|--------------------|
| Unadjusted           | 1  | 1.76 (1.13–2.74) | 1.80 (1.15–2.81) | 2.37 (1.53–3.68) | <0.001             |
| Model 1*             | 1  | 1.74 (1.11–2.73) | 1.93 (1.22–3.04) | 2.60 (1.65–4.08) | <0.001             |
| Model 2 <sup>†</sup> | 1  | 1.96 (1.21–3.18) | 2.34 (1.41–3.86) | 3.03 (1.78–5.14) | <0.001             |
| Model 2+AF           | 1  | 1.86 (1.08–3.22) | 1.99 (1.13–3.52) | 2.40 (1.31–4.40) | 0.007              |

The reference group for OR was defined as “all other subtypes of ischemic stroke,” which indicates the combination of large artery atherosclerosis, small vessel occlusion, and undetermined.

\*Adjusted for sex and age, <sup>†</sup>Adjusted for sex, age, body mass index, systolic blood pressure, fasting blood glucose, total cholesterol, aspartate aminotransferase, alanine aminotransferase, previous stroke, hypertension, diabetes, hyperlipidemia, liver disease, and smoking.

AF: atrial fibrillation, GGT: gamma-glutamyl transferase, OR: odds ratio.
